# Supplementary material for: Swept-source OCTA quantification of capillary closure predicts ETDRS severity staging of NPDR
Source: PubMed Central journal article supplement — Br J Ophthalmol. 2020 Dec 22;106(5):712–8. doi: 10.1136/bjophthalmol-2020-317890 (PMC9046755; doi:10.1136/bjophthalmol-2020-317890), 2020-12-22
Supplement: bjophthalmol-2020-317890supp001.pdf [file bjophthalmol-2020-317890supp001.pdf]

Supplementary Table 1 – Spearman correlation coefficient between AngioPlex and PlexElite Vessel Density measurements in all individuals and NPDR

|                |     | ALL NPDR                          |                                    |                                    | ETDSR20                           |                                    |                                    | ETDRS35                           |                                    |                                    | ETDRS43                           |                                    |                                    |             |
|----------------|-----|-----------------------------------|------------------------------------|------------------------------------|-----------------------------------|------------------------------------|------------------------------------|-----------------------------------|------------------------------------|------------------------------------|-----------------------------------|------------------------------------|------------------------------------|-------------|
|                |     | Central SF<br>[0, 5] <sup>e</sup> | Inner Ring<br>[5, 10] <sup>e</sup> | Circle 3mm<br>[0, 10] <sup>e</sup> | Central SF<br>[0, 5] <sup>e</sup> | Inner Ring<br>[5, 10] <sup>e</sup> | Circle 3mm<br>[0, 10] <sup>e</sup> | Central SF<br>[0, 5] <sup>e</sup> | Inner Ring<br>[5, 10] <sup>e</sup> | Circle 3mm<br>[0, 10] <sup>e</sup> | Central SF<br>[0, 5] <sup>e</sup> | Inner Ring<br>[5, 10] <sup>e</sup> | Circle 3mm<br>[0, 10] <sup>e</sup> |             |
| Vessel Density | SCP | Spearman Coef.                    | <b>0,70</b>                        | <b>0,73</b>                        | <b>0,72</b>                       | 0,59                               | <b>0,78</b>                        | <b>0,71</b>                       | <b>0,77</b>                        | <b>0,66</b>                        | <b>0,68</b>                       | <b>0,65</b>                        | <b>0,92</b>                        | <b>0,92</b> |
|                |     | P-value                           | 0,00                               | 0,00                               | 0,00                              | 0,05                               | 0,00                               | 0,01                              | 0,00                               | 0,00                               | 0,00                              | 0,24                               | 0,03                               | 0,02        |
|                | DCP | Spearman Coef.                    | 0,54                               | 0,55                               | 0,53                              | <b>0,60</b>                        | 0,22                               | 0,28                              | 0,56                               | 0,59                               | 0,57                              | 0,02                               | <b>0,78</b>                        | <b>0,74</b> |
|                |     | P-value                           | 0,0009                             | 0,0006                             | 0,001                             | 0,05                               | 0,52                               | 0,40                              | 0,01                               | 0,01                               | 0,01                              | 0,97                               | 0,12                               | 0,15        |
|                | FR  | Spearman Coef.                    | <b>0,76</b>                        | <b>0,72</b>                        | <b>0,72</b>                       | <b>0,72</b>                        | 0,54                               | 0,49                              | <b>0,88</b>                        | <b>0,75</b>                        | <b>0,77</b>                       | 0,26                               | <b>0,95</b>                        | <b>0,94</b> |
|                |     | P-value                           | 0,0                                | 0,0                                | 0,0                               | 0,01                               | 0,09                               | 0,12                              | 0,00                               | 0,00                               | 0,00                              | 0,68                               | 0,01                               | 0,02        |

Correlations between AngioPlex and PlexElite Vessel Density measurements were performed using Pearson Spearman Coefficient. Statistical significance ( $p < 0.05$ ) highlighted in bold. Strong and Very Strong correlations in grey cells. SCP: Superficial Capillary Plexus; DCP: Deep Capillary Plexus; FR: Full Retina
