# Supplementary material for: Swept-source OCTA quantification of capillary closure predicts ETDRS severity staging of NPDR
Source: PubMed Central journal article supplement — Br J Ophthalmol. 2020 Dec 22;106(5):712–8. doi: 10.1136/bjophthalmol-2020-317890 (PMC9046755; doi:10.1136/bjophthalmol-2020-317890), 2020-12-22

**A** Vessel Density DCP  
Extended 3 15x9mm

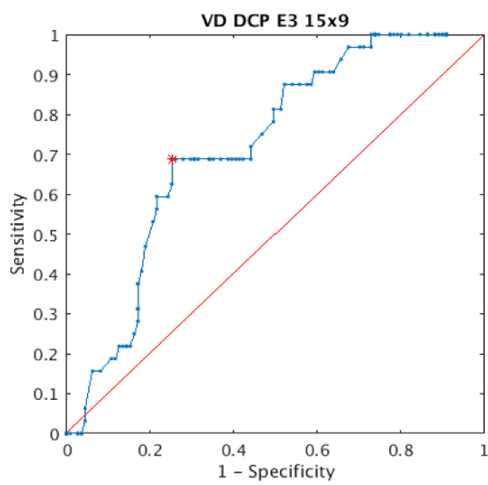

**B** Vessel Density SCP  
Inner Ring 3x3mm

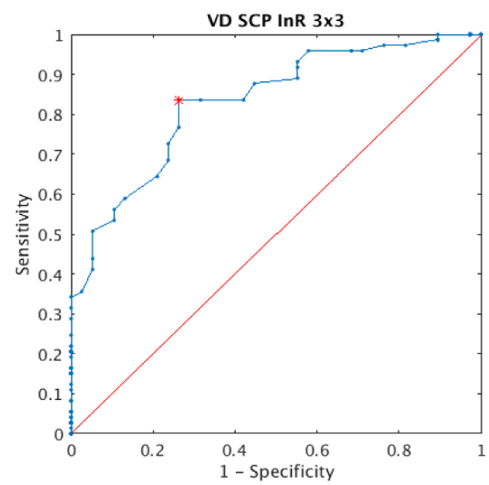

**Healthy and Mild NPDR vs Moderate and Severe NPDR**

Accuracy: 0.734  
Sensitivity: 0.688  
Specificity: 0.748  
**AUC Value: 0.630**  
Opt. Thresh.: 10.646

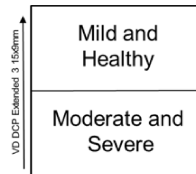

**Healthy vs Mild NPDR**

Accuracy: 0.802  
Sensitivity: 0.836  
Specificity: 0.737  
**AUC Value: 0.831**  
Opt. Thresh.: 14.061

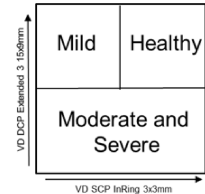

Supplement: bjophthalmol-2020-317890supp002.pdf [file bjophthalmol-2020-317890supp002.pdf]
